# Supplementary material for: Guest-containing supramolecular isomers of silver(i) 3,5-dialkyl-1,2,4-triazolates: syntheses, structures, and structural transformation behaviours
Source: Royal Society of Chemistry journal article supplement (doi:10.1039/c5ce00004a), 2015-01-01
Supplement: c5ce00004a1.pdf [file c5ce00004a1.pdf]

***Electronic supplementary information (ESI)***

Guest-containing supramolecular isomers of silver(I)  
3,5-dialkyl-1,2,4-triazolates: syntheses, structures, and  
transformation behaviours †

Xiao Yang, Yu Wang, Hao-Long Zhou, Yi-Jiang Liu, Chun-Ting He, Rui-Biao Lin, Jie-Peng Zhang\*

MOE Key Laboratory of Bioinorganic and Synthetic Chemistry, School of Chemistry and Chemical Engineering, Sun Yat-Sen University, Guangzhou 510275, China

\*Email: zhangjp7@mail.sysu.edu.cn

Table S1. Selected bond lengths (Å) and angles (°), as well as short contacts (Å).

| <b>2b<sup>a</sup></b>                                                          |            | <b>2b<sup>b</sup></b>                                        |           | <b>4c<sup>c</sup></b>                                     |            |
|--------------------------------------------------------------------------------|------------|--------------------------------------------------------------|-----------|-----------------------------------------------------------|------------|
| Ag1-N3A                                                                        | 2.161(3)   | Ag1-N15A                                                     | 2.194(2)  | Ag1-N2A                                                   | 2.238(6)   |
| Ag1-N3                                                                         | 2.161(3)   | Ag1-N4B                                                      | 2.194(2)  | Ag1-N1B                                                   | 2.251(4)   |
| Ag1-N1                                                                         | 2.309(4)   | Ag1-N1                                                       | 2.376(2)  | Ag1-N1                                                    | 2.251(4)   |
| Ag2-N6                                                                         | 2.195(3)   | Ag2-N2                                                       | 2.163(2)  | N1-C1                                                     | 1.333(7)   |
| Ag2-N5                                                                         | 2.214(3)   | Ag2-N10                                                      | 2.169(2)  | N1-N1C                                                    | 1.396(9)   |
| Ag2-N7B                                                                        | 2.273(3)   | Ag2-N6                                                       | 2.315(2)  | N2-C1C                                                    | 1.353(6)   |
| Ag3-N8C                                                                        | 2.170(3)   | Ag3-N9                                                       | 2.162(2)  | N2-C1                                                     | 1.353(6)   |
| Ag3-N2D                                                                        | 2.187(3)   | Ag3-N5B                                                      | 2.177(2)  | N2-Ag1D                                                   | 2.238(6)   |
| Ag3-N4                                                                         | 2.356(3)   | Ag3-N11                                                      | 2.380(2)  |                                                           |            |
| N2-Ag3E                                                                        | 2.187(3)   | Ag4-N8C                                                      | 2.216(2)  | Ag1...H4E                                                 | 2.75(1)    |
| N7-Ag2B                                                                        | 2.273(3)   | Ag4-N12                                                      | 2.222(2)  | C7...H6                                                   | 2.82(1)    |
| N8-Ag3F                                                                        | 2.170(3)   | Ag4-N13                                                      | 2.242(2)  | H7...H7F                                                  | 2.34(2)    |
|                                                                                |            | Ag5-N14                                                      | 2.195(2)  |                                                           |            |
|                                                                                |            | Ag5-N3D                                                      | 2.214(2)  |                                                           |            |
|                                                                                |            | Ag5-N7C                                                      | 2.282(2)  |                                                           |            |
|                                                                                |            | N3-Ag5E                                                      | 2.214(2)  |                                                           |            |
|                                                                                |            | N4-Ag1F                                                      | 2.194(2)  |                                                           |            |
|                                                                                |            | N5-Ag3F                                                      | 2.177(2)  |                                                           |            |
|                                                                                |            | N7-Ag5G                                                      | 2.282(2)  |                                                           |            |
|                                                                                |            | N8-Ag4G                                                      | 2.216(2)  |                                                           |            |
|                                                                                |            | N15-Ag1H                                                     | 2.194(2)  |                                                           |            |
|                                                                                |            |                                                              |           |                                                           |            |
| N3A-Ag1-N3                                                                     | 138.64(16) | N15A-Ag1-N4B                                                 | 140.90(8) | N2A-Ag1-N1B                                               | 122.96(11) |
| N3A-Ag1-N1                                                                     | 110.68(8)  | N15A-Ag1-N1                                                  | 111.19(8) | N2A-Ag1-N1                                                | 122.96(11) |
| N3-Ag1-N1                                                                      | 110.68(8)  | N4B-Ag1-N1                                                   | 106.61(8) | N1B-Ag1-N1                                                | 114.1(2)   |
| N6-Ag2-N5                                                                      | 130.08(12) | N2-Ag2-N10                                                   | 139.80(9) |                                                           |            |
| N6-Ag2-N7B                                                                     | 115.76(10) | N2-Ag2-N6                                                    | 111.32(8) |                                                           |            |
| N5-Ag2-N7B                                                                     | 114.14(12) | N10-Ag2-N6                                                   | 108.81(9) |                                                           |            |
| N8C-Ag3-N2D                                                                    | 141.57(12) | N9-Ag3-N5B                                                   | 144.50(8) |                                                           |            |
| N8C-Ag3-N4                                                                     | 114.51(12) | N9-Ag3-N11                                                   | 117.31(9) |                                                           |            |
| N2D-Ag3-N4                                                                     | 102.07(12) | N5B-Ag3-N11                                                  | 95.78(9)  |                                                           |            |
|                                                                                |            | N8C-Ag4-N12                                                  | 124.29(9) |                                                           |            |
|                                                                                |            | N8C-Ag4-N13                                                  | 116.77(9) |                                                           |            |
|                                                                                |            | N12-Ag4-N13                                                  | 118.64(9) |                                                           |            |
|                                                                                |            | N14-Ag5-N3D                                                  | 131.22(8) |                                                           |            |
|                                                                                |            | N14-Ag5-N7C                                                  | 115.55(9) |                                                           |            |
|                                                                                |            | N3D-Ag5-N7C                                                  | 113.16(9) |                                                           |            |
| <sup>a, b, c</sup> Symmetry transformations used to generate equivalent atoms: |            |                                                              |           |                                                           |            |
| <sup>a</sup> A = -x+2, y, -z+1/2<br>B = -x+1, -y+1, -z+1                       |            | <sup>b</sup> A = x, -y+1/2, z-1/2<br>B = -x+1, y-1/2, -z+1/2 |           | <sup>c</sup> A = -y+1/2, -z+3/2, -x+1/2<br>B = x, y, -z+1 |            |

|                 |                           |                              |
|-----------------|---------------------------|------------------------------|
| C = $x+1, y, z$ | C = $x-1, y, z$           | C = $-x, -y+1, z$            |
| D = $x, y+1, z$ | D = $x-1, -y+1/2, z+1/2$  | D = $-z+1/2, -x+1/2, -y+3/2$ |
| E = $x, y-1, z$ | E = $x+1, -y+1/2, z-1/2$  | E = $1/2+x, -1/2+y, -1/2+z$  |
| F = $x-1, y, z$ | F = $-x+1, y+1/2, -z+1/2$ | F = $1+x, y, -1+z$           |
|                 | G = $x+1, y, z$           |                              |
|                 | H = $x, -y+1/2, z+1/2$    |                              |

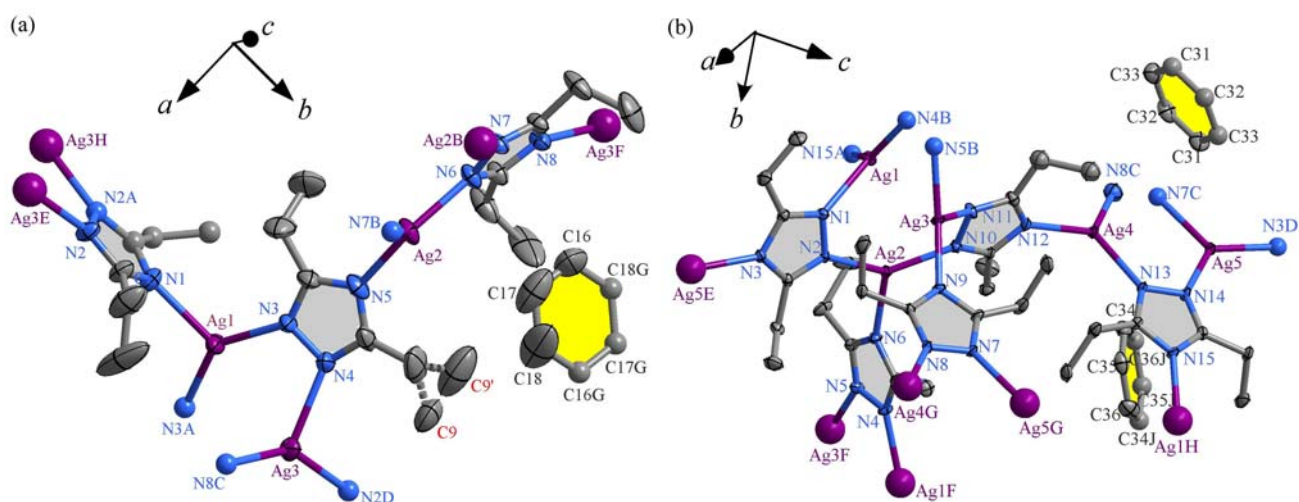

**Fig. S1** Perspective view of the coordination environment of **2b** ((a), 2-fold disordered ethyl groups are shown as dashed bonds in red) and **2b'** (b) (at 50% probability; hydrogen atoms are omitted for clarity). Symmetry codes: A =  $2-x, y, 0.5-z$ ; B =  $-x+1, -y+1, 1-z$ ; C =  $1+x, y, z$ ; D =  $x, 1+y, z$ ; E =  $x, y-1, z$ ; F =  $x-1, y, z$ ; G =  $-x+1, -y+2, 1-z$ , H =  $2-x, -1+y, 0.5-z$  for **2b**. A =  $x, 0.5-y, -0.5+z$ ; B =  $1-x, -0.5+y, 0.5-z$ ; C =  $-1+x, y, z$ ; D =  $-1+x, -y+0.5, z+0.5$ ; E =  $1+x, 0.5-y, z-0.5$ ; F =  $1-x, y+0.5, 0.5-z$ ; G =  $x+1, y, z$ ; H =  $x, 0.5-y, 0.5+z$ ; I =  $-x, -y, 1-z$ ; J =  $-x, -y+1, -z+1$  for **2b'**.

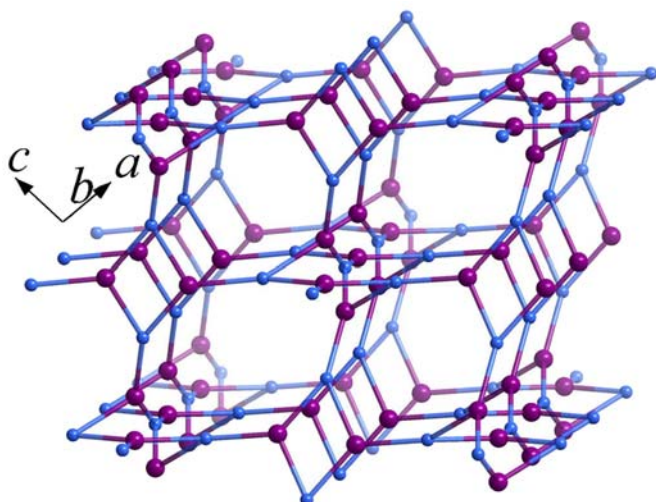

**Fig. S2** The simplified topology structure of **2b/2b'** (purple and blue spheres represent the Ag ions and the triazolate ligands, two-colour sticks represent the coordination bonds).

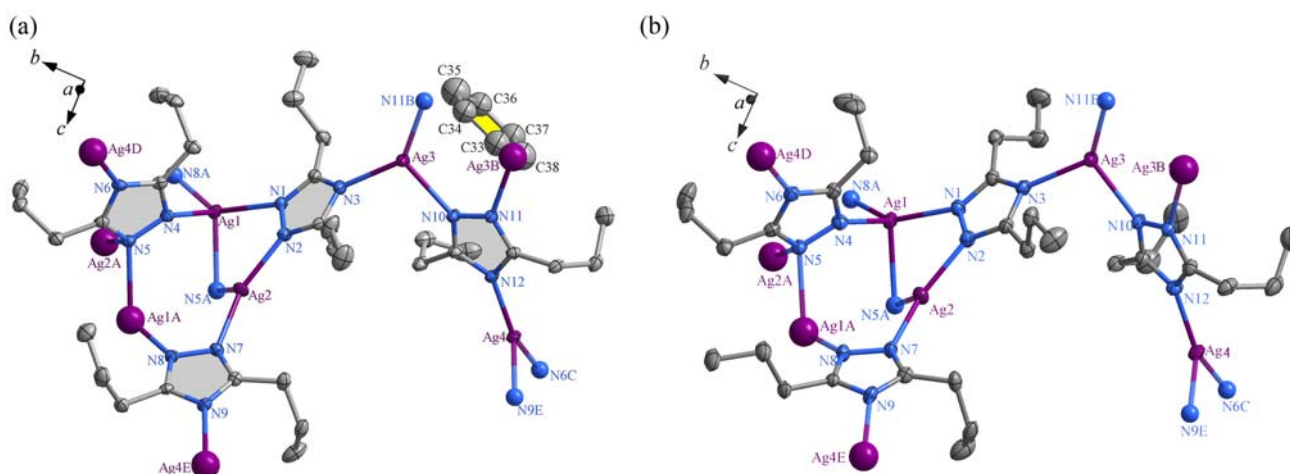

**Fig. S3** Perspective view of the coordination environment of (a) **3b** and (b) **3b'** (at 50% probability; hydrogen atoms are omitted for clarity). Symmetry codes: A = 1-x, 2-y, 1-z; B = 2-x, 1-y, -z; C = x, -1+y, Z; D = x, 1+y, z; E = 2-x, 1-y, 1-z. Note that the benzene molecule in **3b** has half site occupancy.

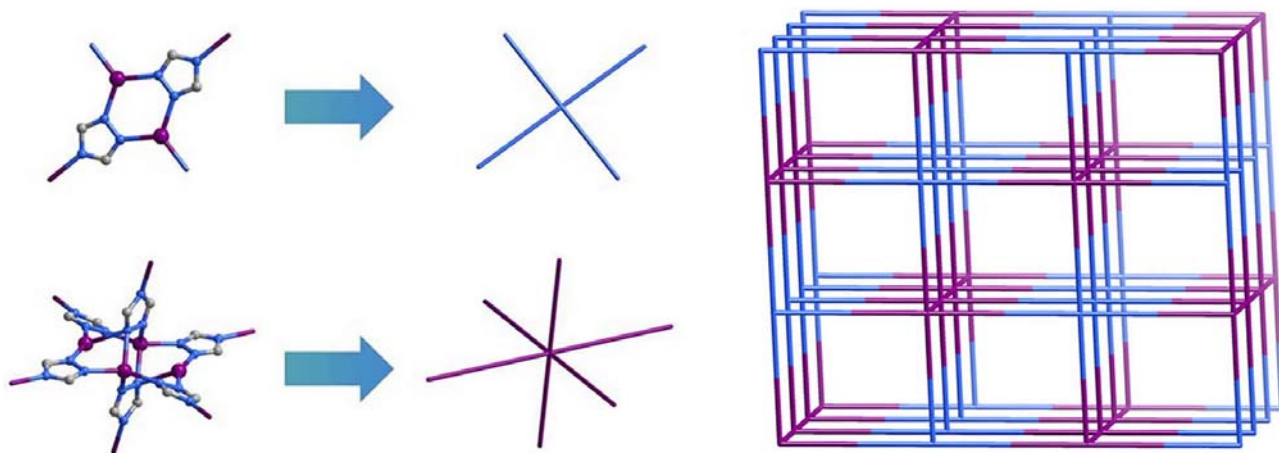

**Fig. S4** The simplified topology structures of **3b/3b'**.

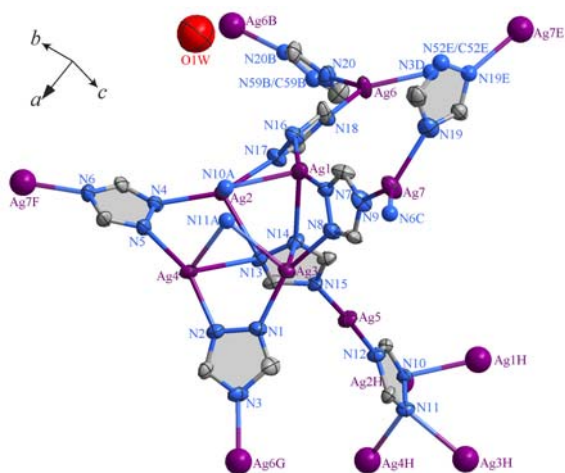

**Fig. S5** Perspective view of the coordination environment of **4b** (at 50% probability; isopropyl groups are omitted for clarity). Symmetry codes: A =  $x, y, -1+z$ ; B =  $-x, 1-y, z$ ; C =  $0.5-x, -0.5+y, -z$ ; D =  $-0.5+x, 0.5-y, 1-z$ ; E =  $-x, -y, z$ ; F =  $0.5-x, 0.5+y, -z$ ; G =  $0.5+x, 0.5-y, 1-z$ ; H =  $x, y, 1+z$ .

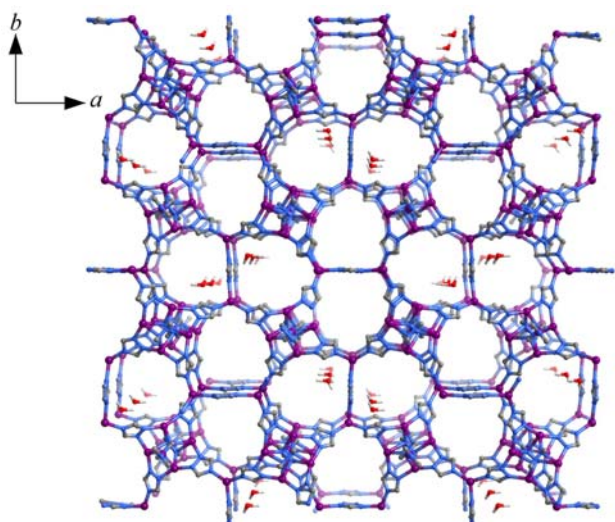

**Fig. S6** Perspective view of **4b** along the *c*-axis (isopropyl groups are omitted for clarity).

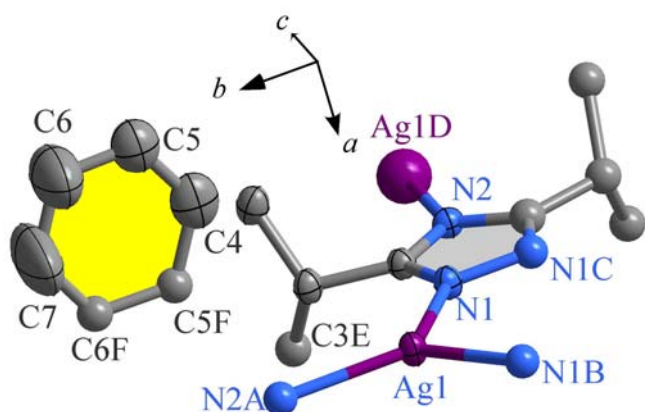

**Fig. S7** Perspective view of the coordination environment of **4c** (at 50% probability; hydrogen atoms are omitted for clarity). Symmetry codes: A =  $x+0.5, -y+0.5, -z+1.5$ ; B =  $x, y, -z+1$ ; C =  $-x, 1-y, z$ ; D =  $0.5-x, 1.5-y, -0.5+z$ ; E =  $-x, y, z$ , F =  $-x, y, -z+2$ .

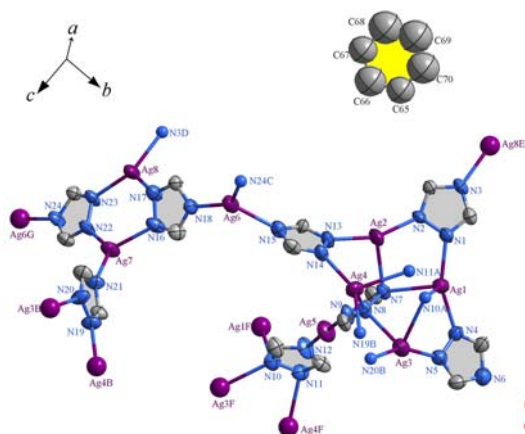

**Fig. S8** Perspective view of the coordination environment of **4d** (at 50% probability; hydrogen atoms are omitted for clarity). Symmetry codes: A =  $-0.5+x, 1.5-y, -0.5+z$ ; B =  $-x, 1-y, 1-z$ ; C =  $-0.5+x, 0.5-y, -0.5+z$ ; D =  $0.5-x, -0.5+y, 0.5-z$ ; E =  $0.5-x, 0.5+y, 0.5-z$ ; F =  $0.5+x, 1.5-y, 0.5+z$ ; G =  $0.5+x, 0.5-y, 0.5+z$ .

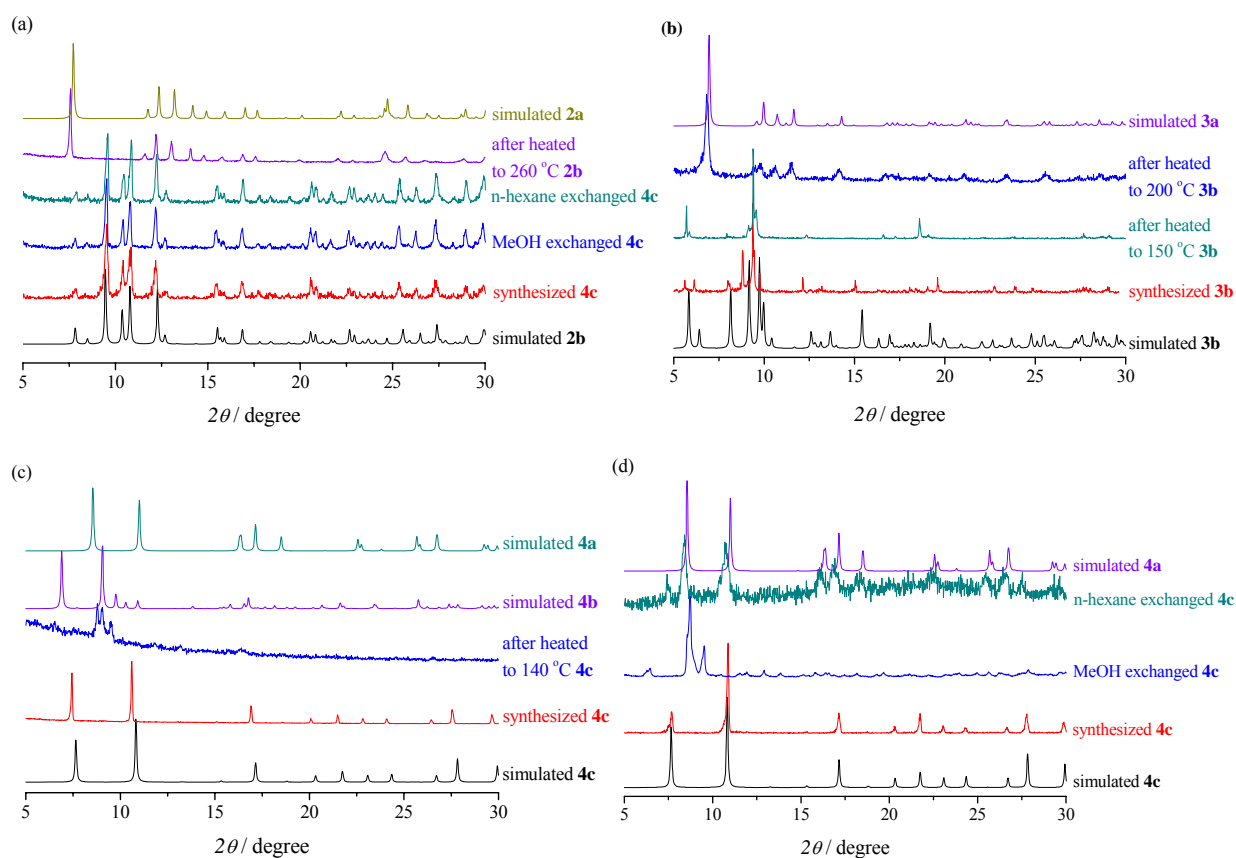

**Fig. S9** PXRD patterns of the structure transformation of (a) **2b** after heated to 260 °C and immersed in methanol or n-hexane for 7 days, (b) **3b** after heated to 150 °C and 200 °C, (c) **4c** after heated to 140 °C and (d) **4c** after immersed in methanol and n-hexane for 1 day.
